# Supplementary material for: pH-Triggered release of gemcitabine from polymer coated nanodiamonds fabricated by RAFT polymerization and copper free click chemistry
Source: Royal Society of Chemistry journal article supplement (doi:10.1039/c6py01188h), 2016-01-01
Supplement: c6py01188h1.pdf [file c6py01188h1.pdf]

## Supporting Information

### pH-Triggered Release of Gemcitabine from Polymer Coated Nanodiamonds Fabricated by RAFT polymerization and Copper Free Click Chemistry

Haiwang Lai, Mingxia Lu, Hongxu Lu, Martina H. Stenzel\* and Pu Xiao\*

Centre for Advanced Macromolecular Design, School of Chemistry, The University of New South Wales,  
Sydney, Australia.

Corresponding Authors: [m.stenzel@unsw.edu.au](mailto:m.stenzel@unsw.edu.au); [p.xiao@unsw.edu.au](mailto:p.xiao@unsw.edu.au)

#### 1. Synthesis.

##### 1.1 RAFT agent synthesis.

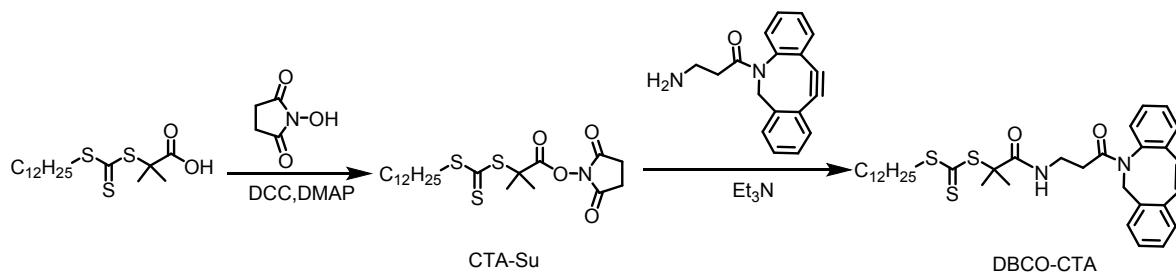

**Scheme S1.** Synthesis of DBCO-CTA.

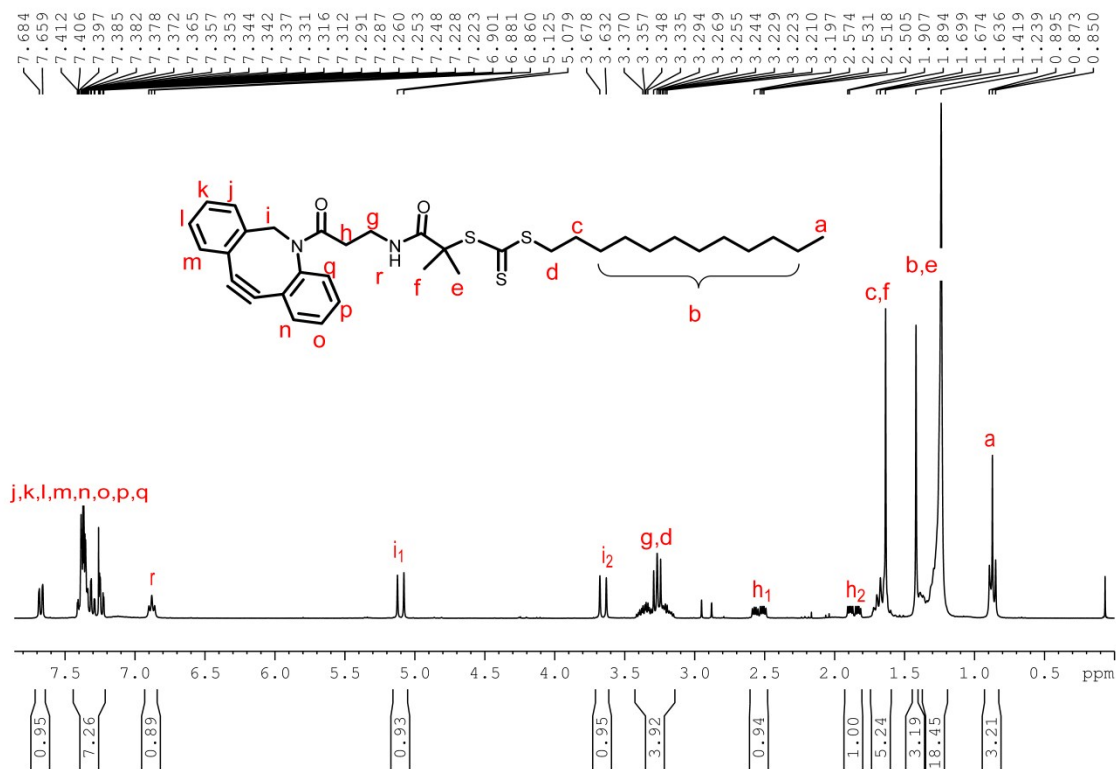

**Figure S1.**  $^1\text{H}$  NMR spectrum of DBCO-CTA in  $\text{CDCl}_3$ .

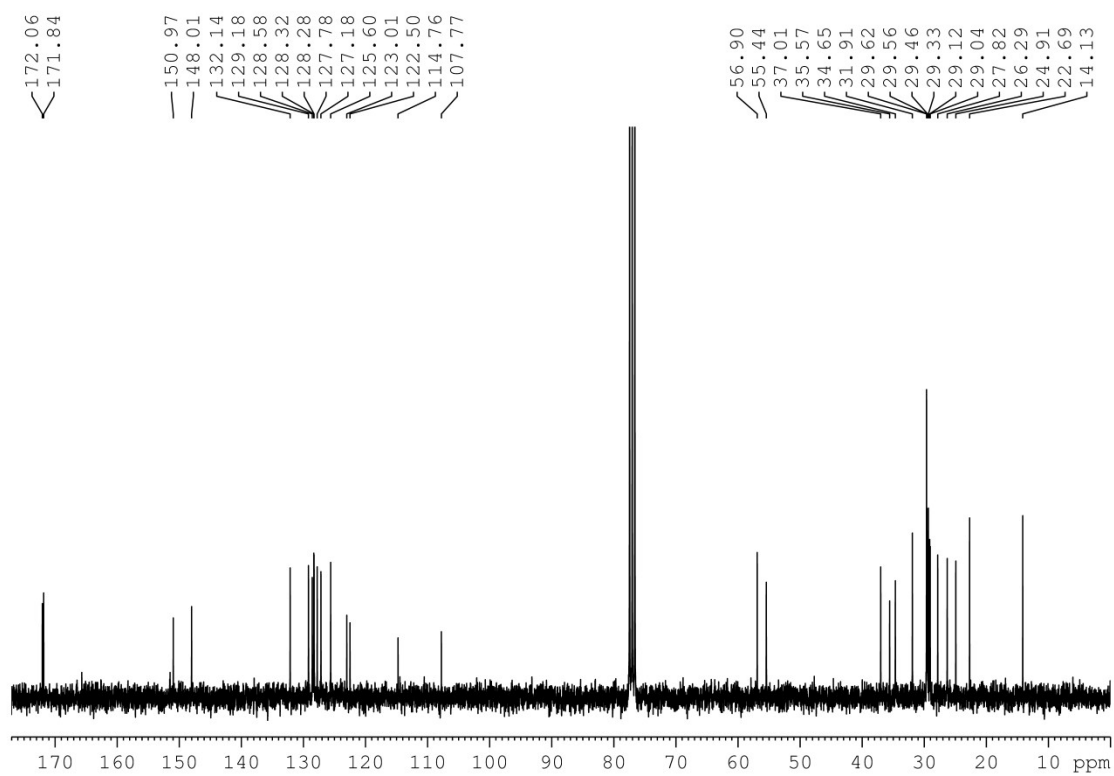

**Figure S2.**  $^{13}\text{C}$  NMR spectrum of DBCO-CTA in  $\text{CDCl}_3$ .

## 1.2 Monomer synthesis.

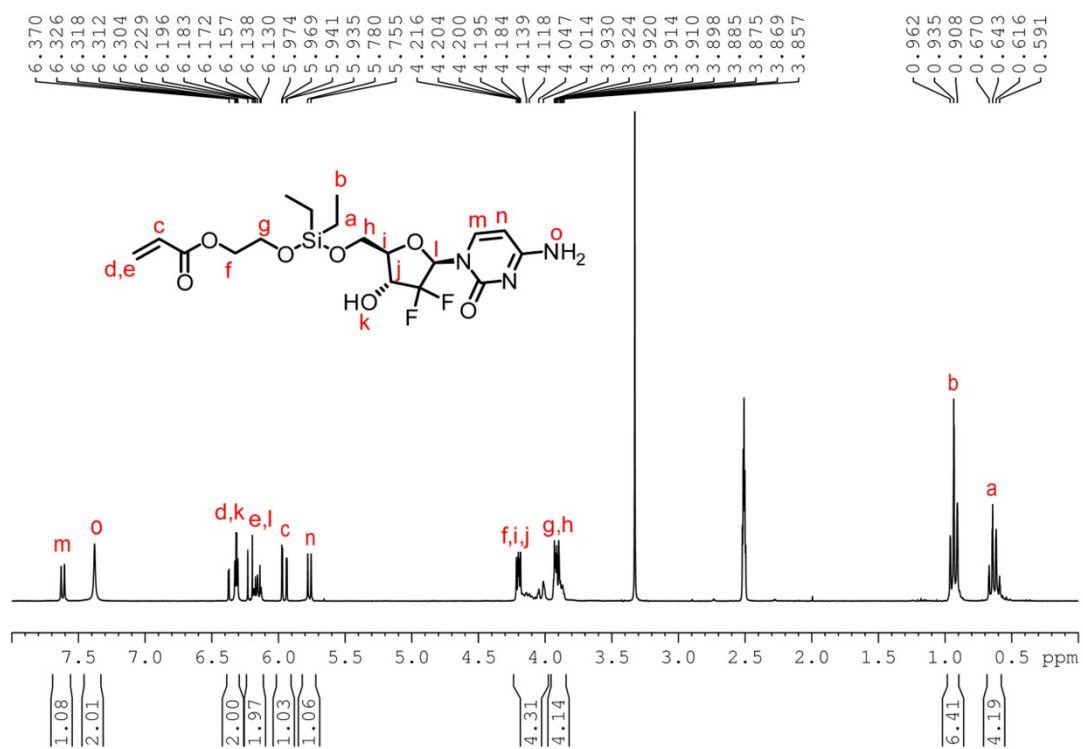

**Figure S3.** <sup>1</sup>H NMR spectrum of HEAGem monomer in *d*<sub>6</sub>-DMSO.

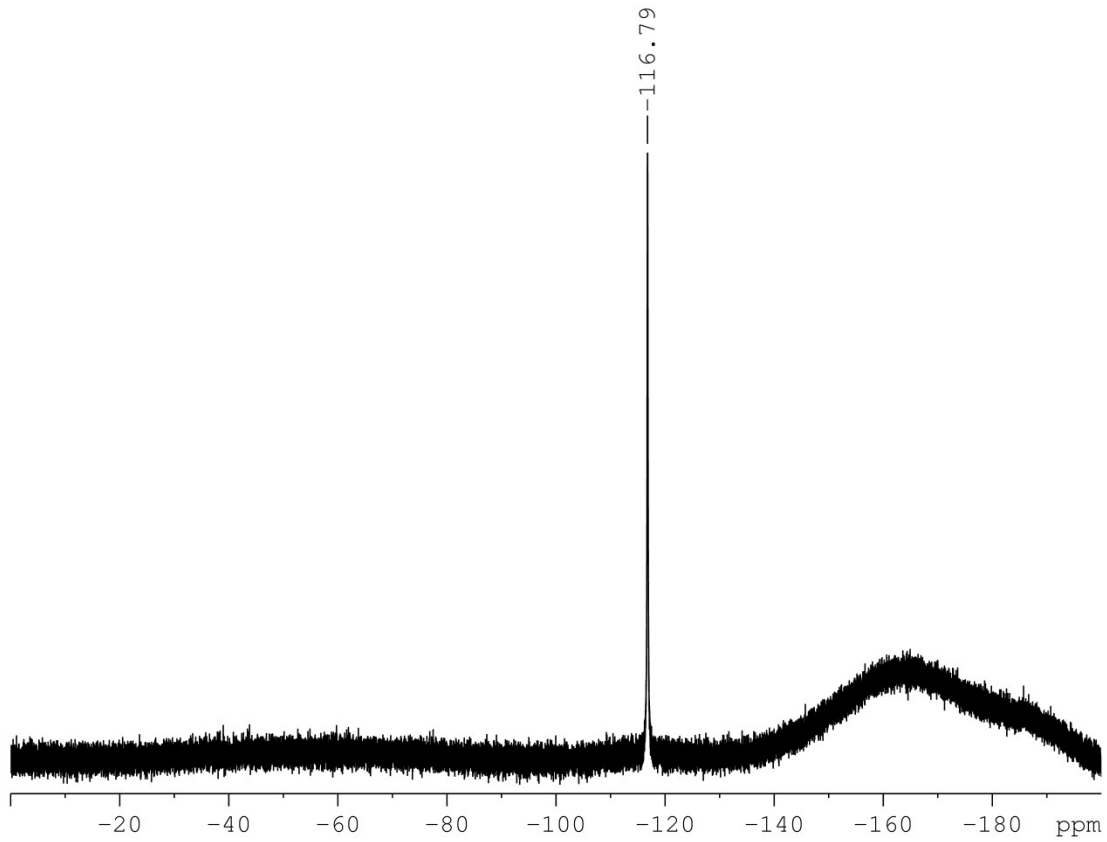

**Figure S4.**  $^{19}\text{F}$  NMR spectrum of HEAGem monomer in  $d_6$ -DMSO.

### 1.3 Polymerization (Synthesis of prodrug polymers with DBCO end groups).

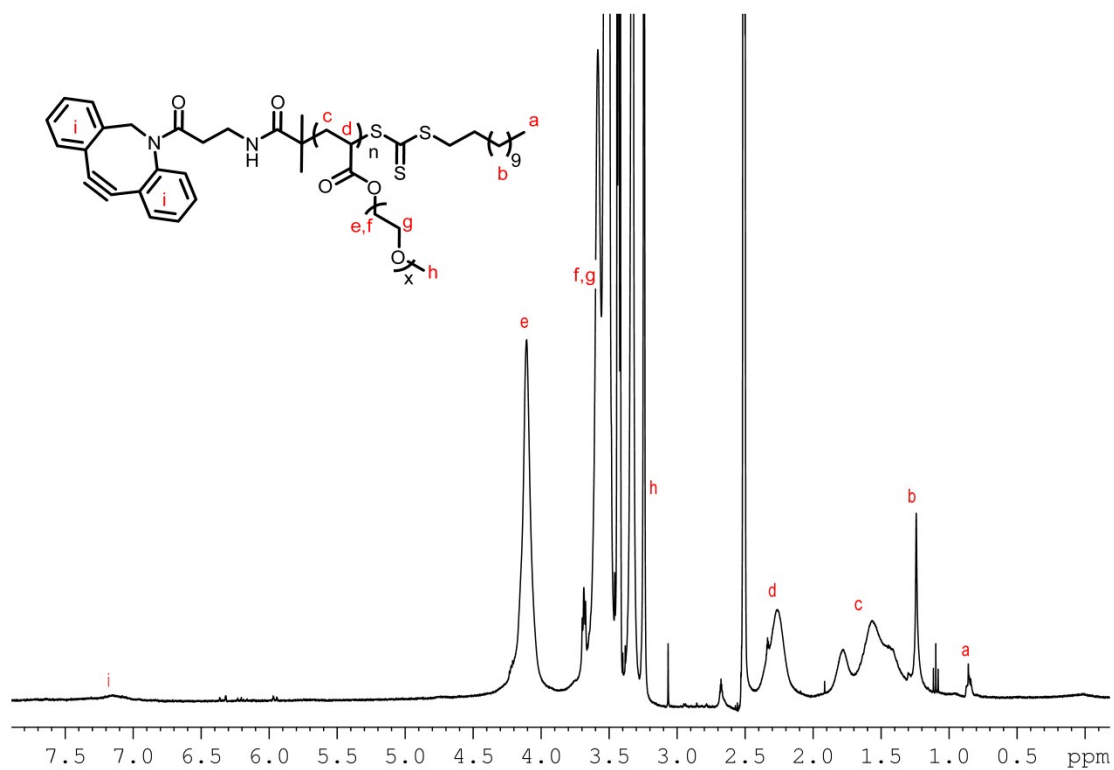

**Figure S5.** <sup>1</sup>H NMR spectrum of DBCO-POEGMEA<sub>45</sub> in *d*<sub>6</sub>-DMSO.

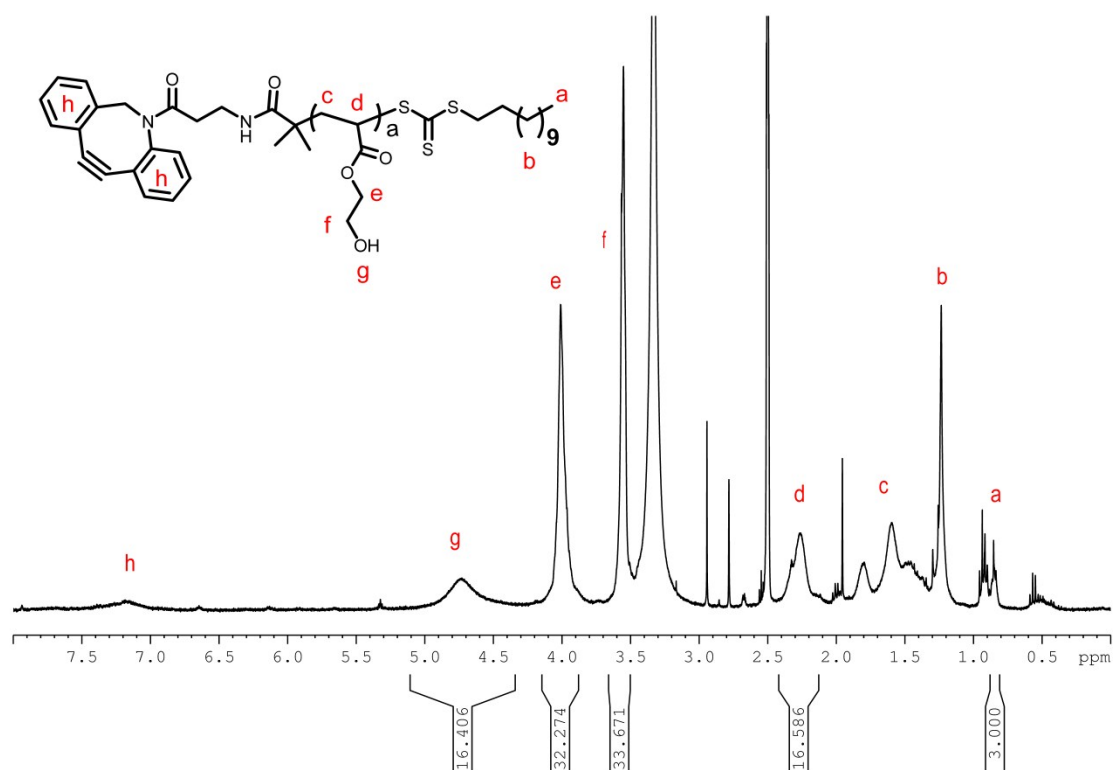

**Figure S6.** <sup>1</sup>H NMR spectrum of DBCO-PHEAGem<sub>16</sub> after hydrolysis to release all the drug (resulting in DBCO-PHEA<sub>16</sub>) in *d*<sub>6</sub>-DMSO.

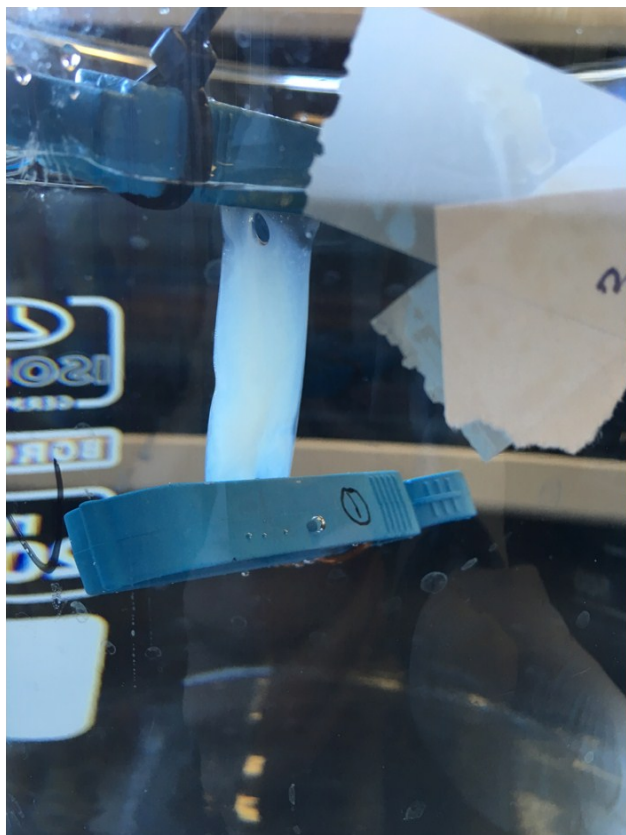

Dialysis for 0 h

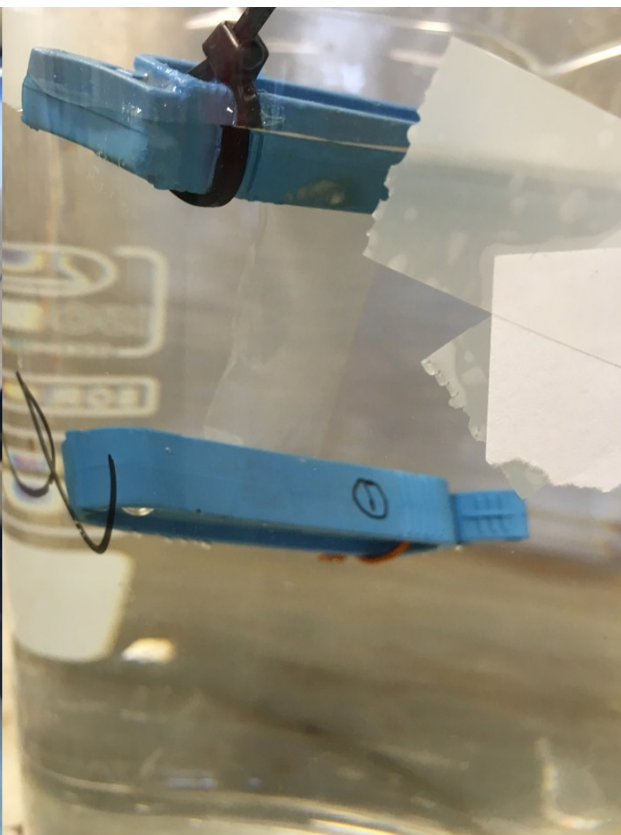

Dialysis for 16 h

**Figure S7.** The turbidity of DBCO-PHEAGem<sub>16</sub> in dialysis bag against acidic water (pH 3) at beginning and 16 h.



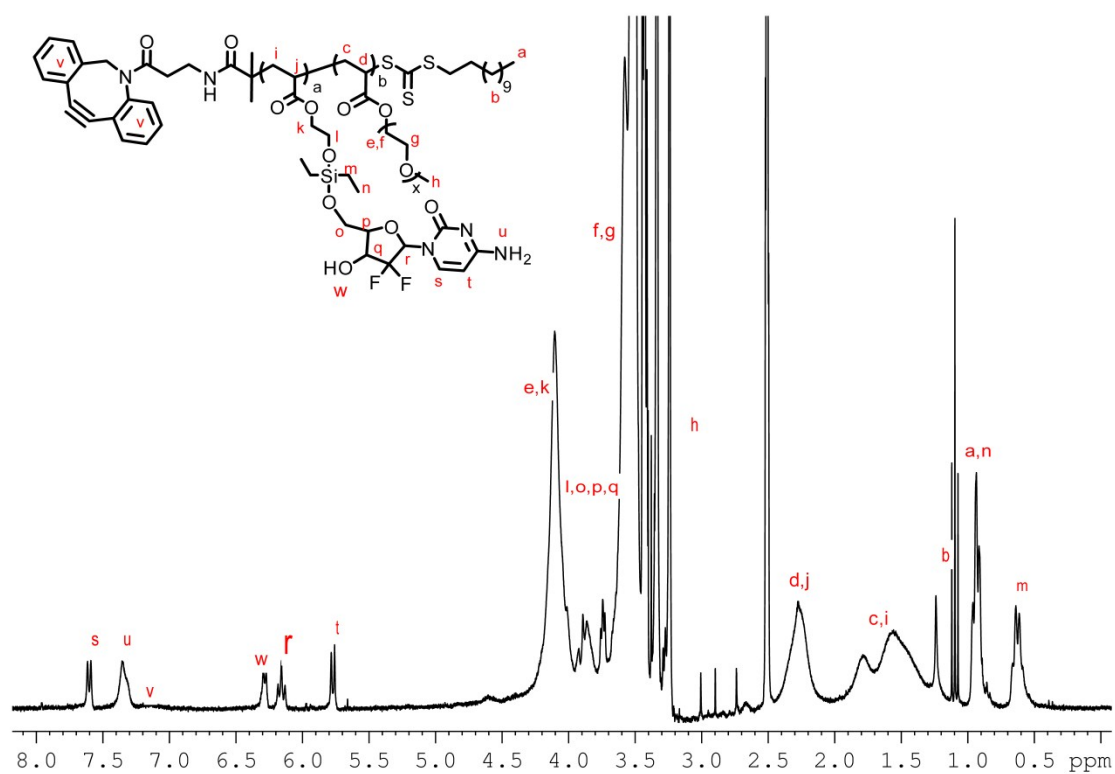

**Figure S8.** <sup>1</sup>H NMR spectrum of DBCO-PHEAGem<sub>2</sub>-co-POEGMEA<sub>18</sub> in *d*<sub>6</sub>-DMSO.

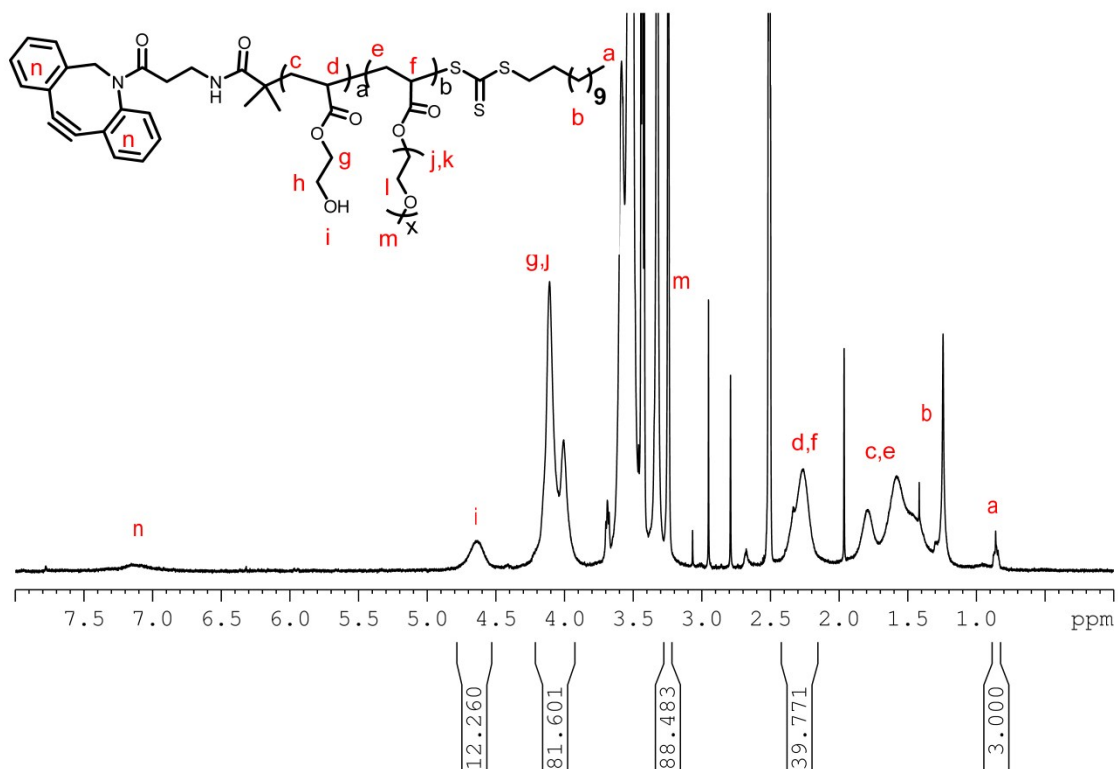

**Figure S9.** <sup>1</sup>H NMR spectrum of DBCO-PHEAGem<sub>12</sub>-co-POEGMEA<sub>28</sub> after hydrolysis to release all the drug (resulting in DBCO-PHEA<sub>12</sub>- POEGMEA<sub>28</sub>) in *d*<sub>6</sub>-DMSO.

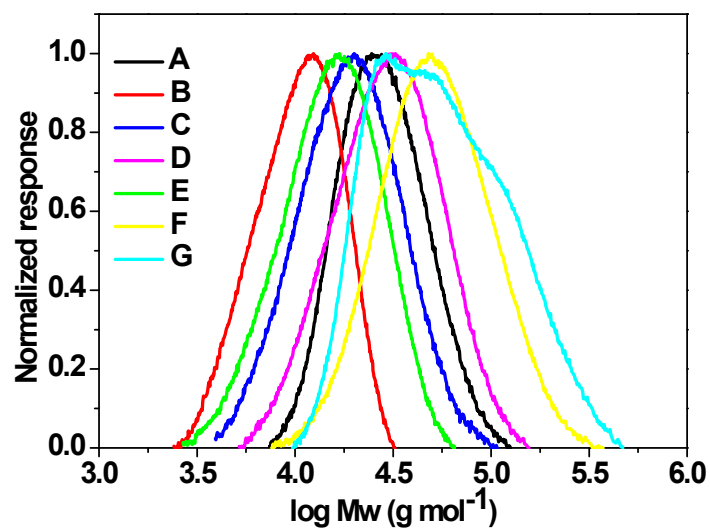

**Figure S10.** SEC (DMAc) traces of A) DBCO-PHEAGem<sub>12-co</sub>-POEGMEA<sub>28</sub>, B) DBCO-PHEAGem<sub>16</sub>, C) DBCO-PHEAGem<sub>10-co</sub>-POEGMEA<sub>14</sub>, D) DBCO-POEGMEA<sub>45</sub>, E) DBCO-PHEAGem<sub>2-co</sub>-POEGMEA<sub>18</sub>, F) DBCO-PHEAGem<sub>20-co</sub>-POEGMEA<sub>40</sub>, and G) DBCO-PHEAGem<sub>16-b</sub>-POEGMEA<sub>38</sub>.

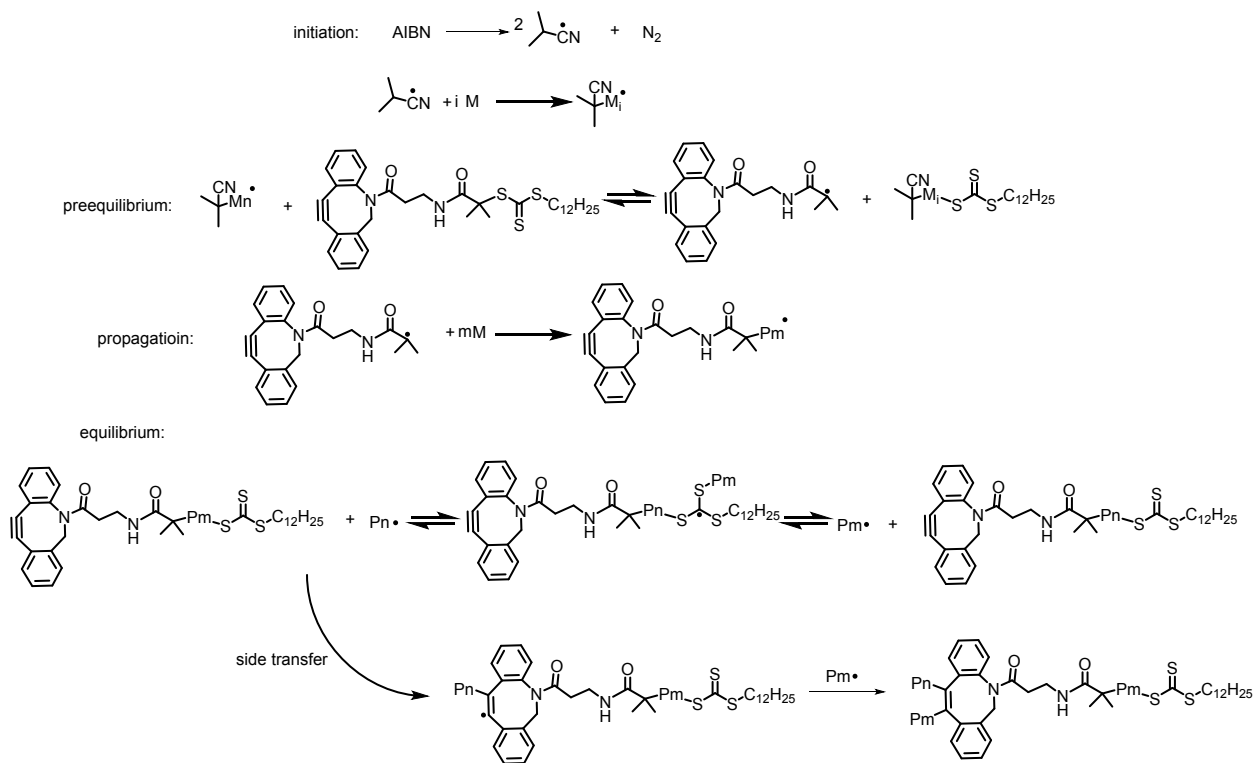

**Scheme S2.** Proposed side reactions in DBCO-CTA mediated RAFT polymerization.

## 2. Surface functionalization of NDs.

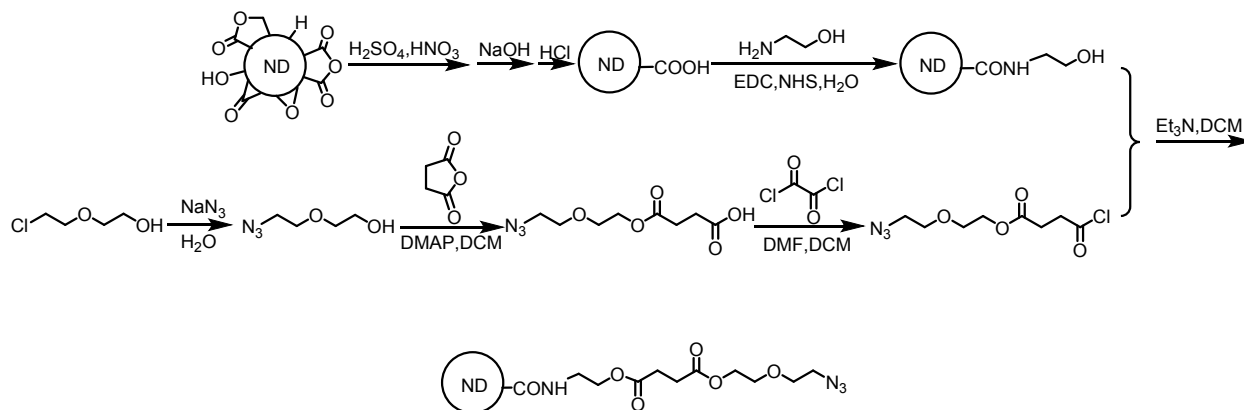

**Scheme S3.** Surface functionalization of NDs.

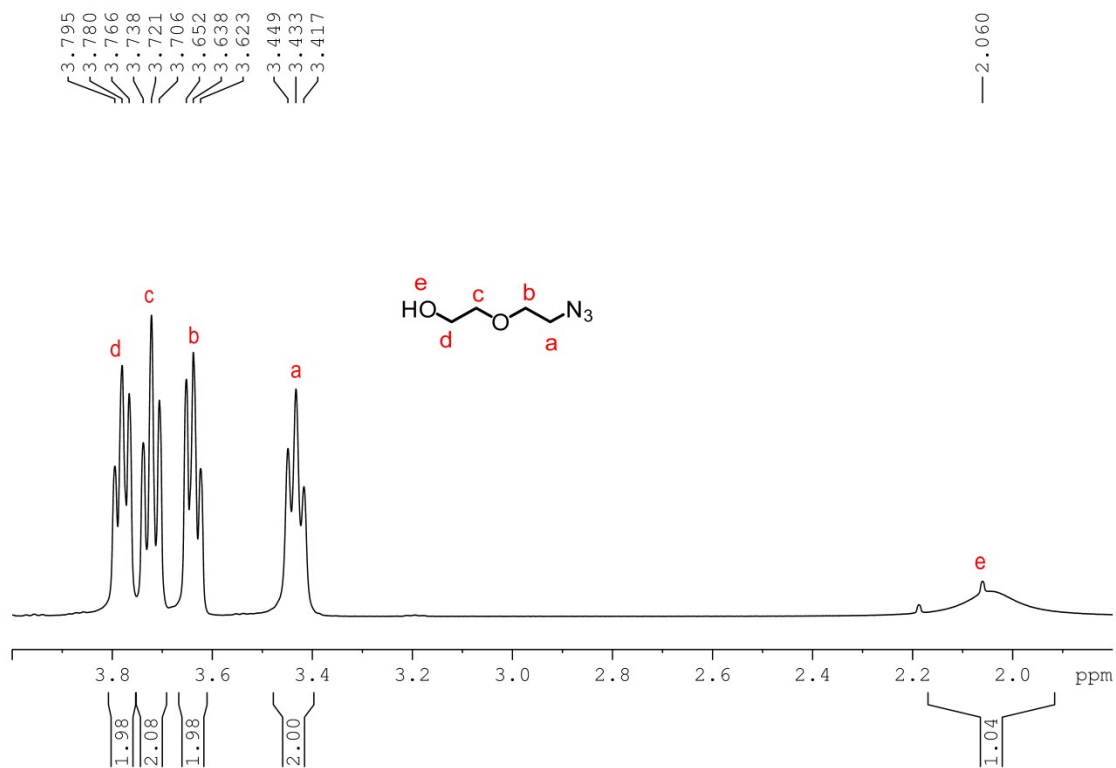

**Figure S11.**  $^1\text{H}$  NMR spectrum of 2-azidethoxyethanol in  $\text{CDCl}_3$ .

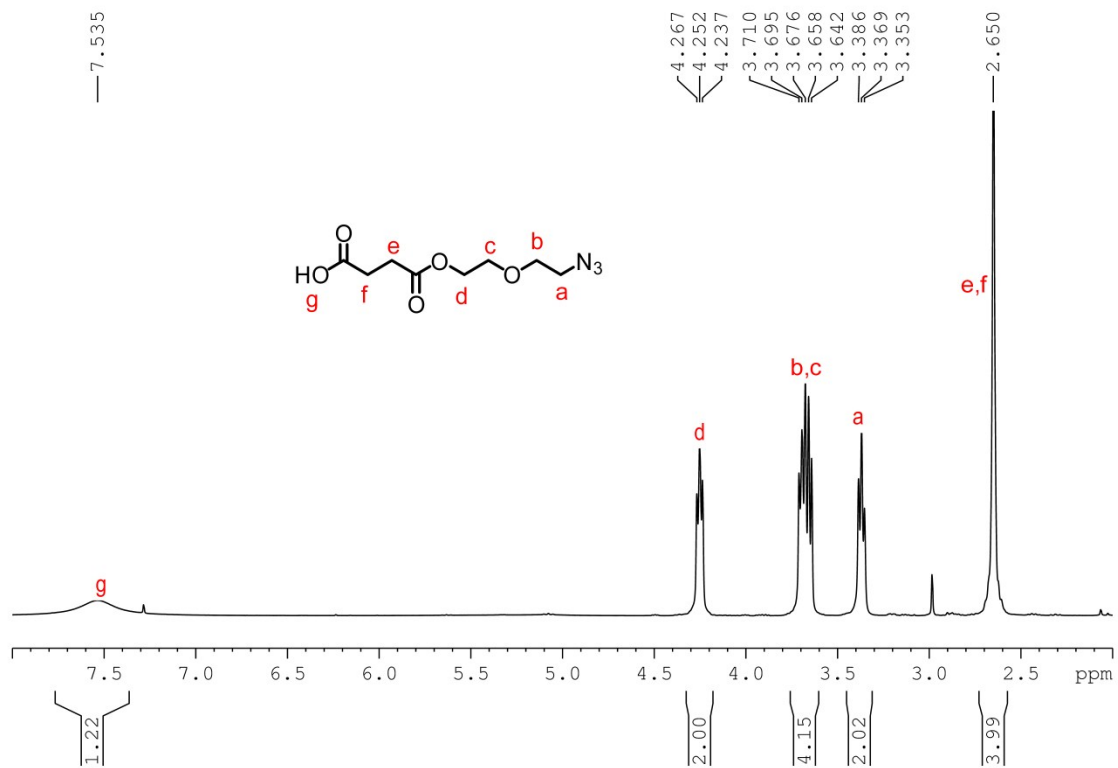

**Figure S12.** <sup>1</sup>H NMR spectrum of 4-(2-(2-azidoethoxy)ethoxy)-4-oxobutanoic acid in CDCl<sub>3</sub>.

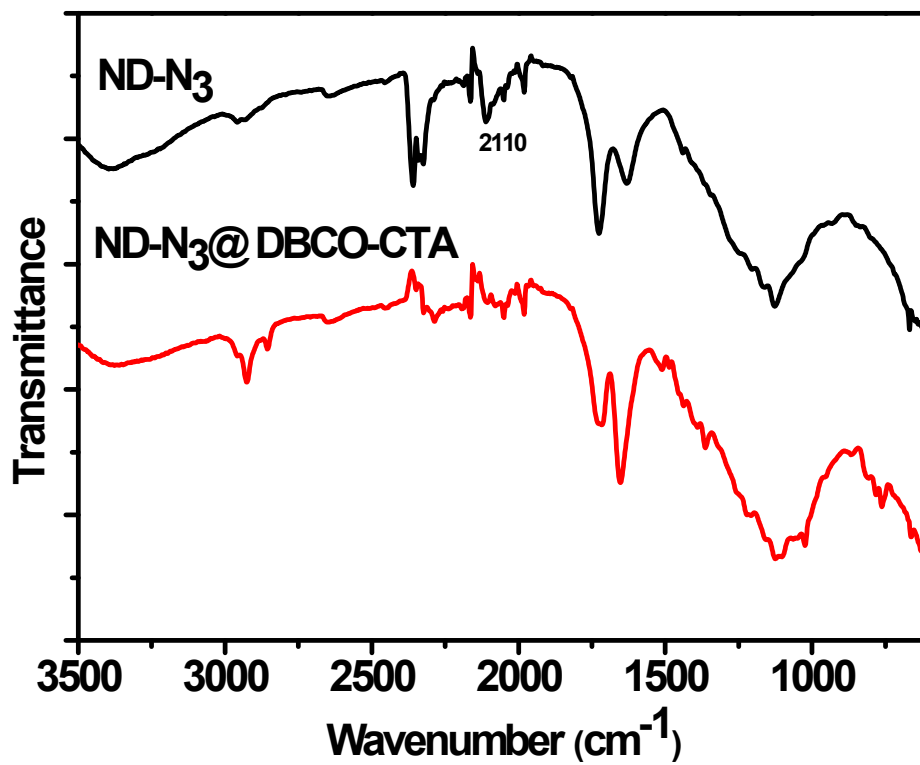

Figure S13. FTIR spectra of ND-N<sub>3</sub>, and ND-N<sub>3</sub>@DBCO-CTA.

### 3. Surface coating with polymer.

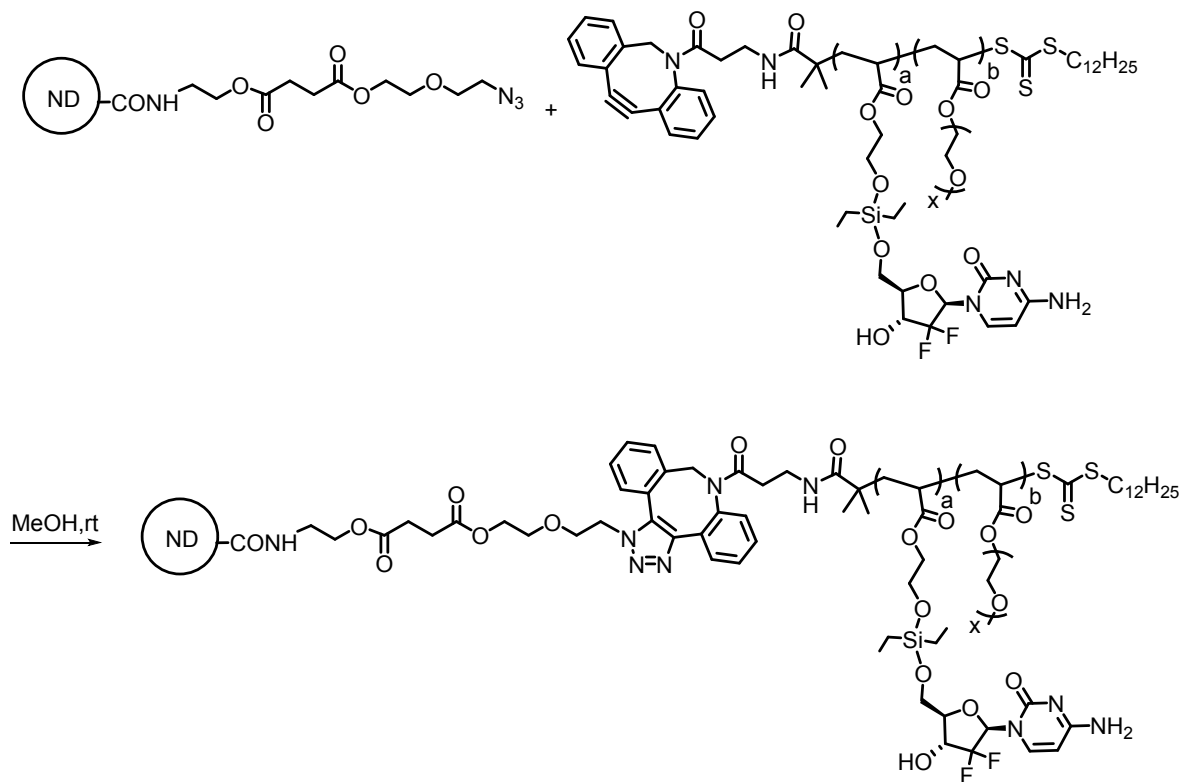

**Scheme S4.** Coupling the prodrug polymer to the surface of NDs using SPAAC click chemistry.



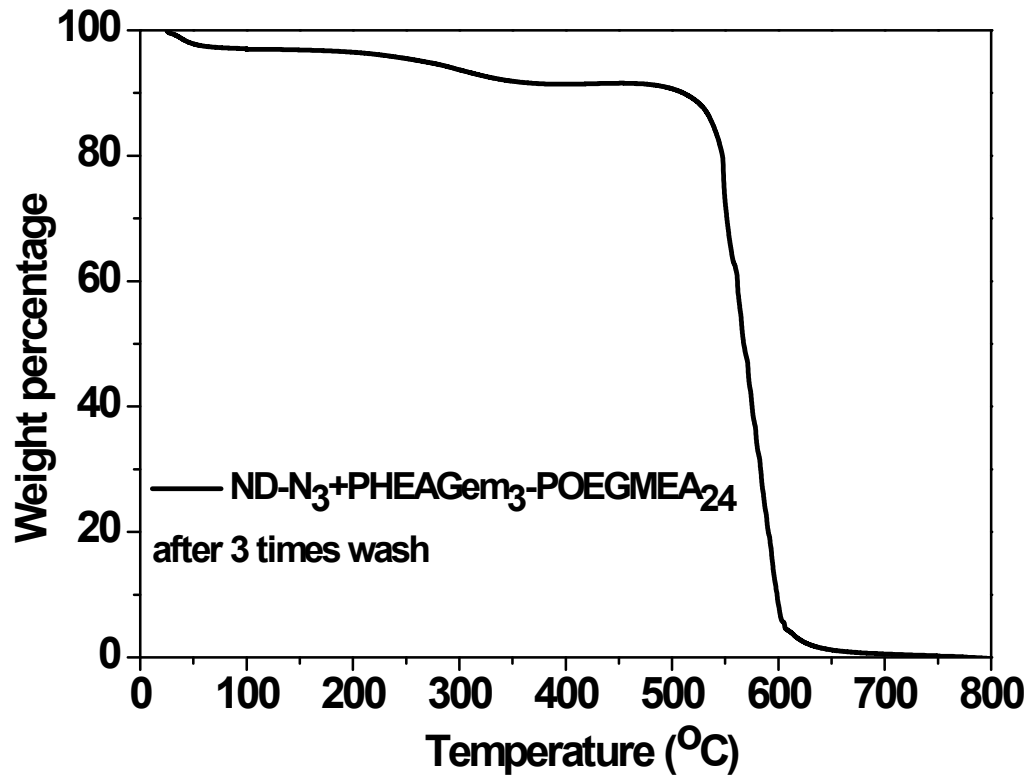

**Figure S14.** TGA graph of NDs obtained after mixing ND-N<sub>3</sub> and PHEAGem<sub>3</sub>-*co*-POEGMEA<sub>24</sub> and 3 times of centrifuge and washing cycles with methanol.

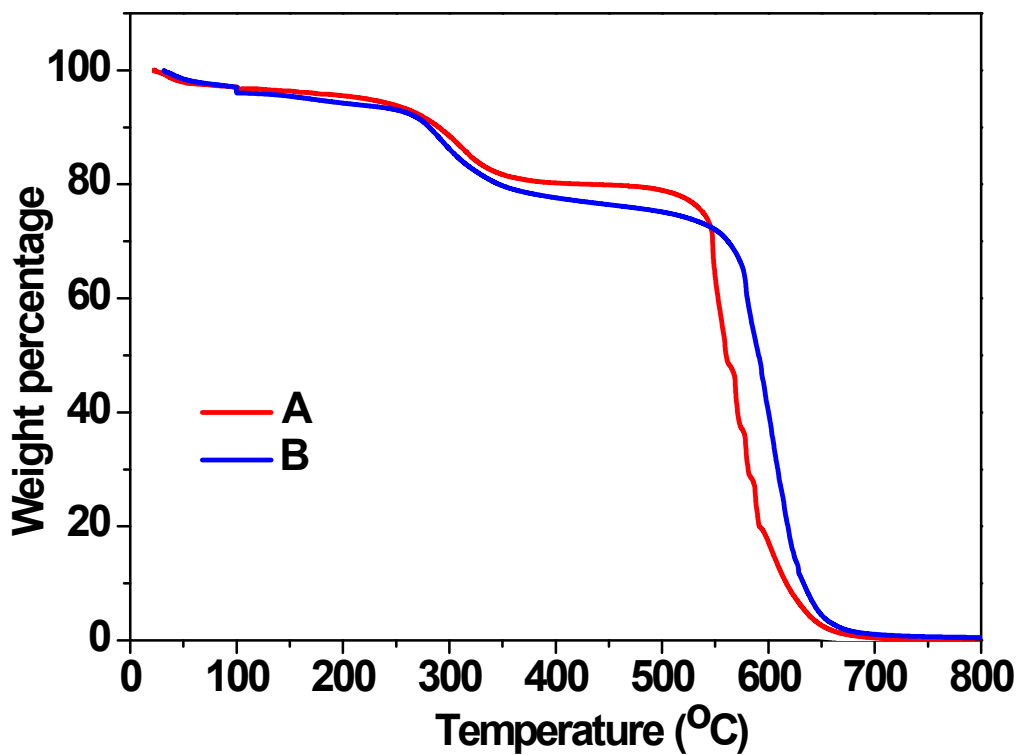

**Figure S15.** TGA curves of A) ND@PHEAGem<sub>12</sub>-*co*-POEGMEA<sub>28</sub> and B) ND@PHEAGem<sub>2</sub>-*co*-POEGMEA<sub>18</sub>.

**Table S1.** Grafting densities of the prepared polymer coated NDs determined by TGA, molecular weight and particle sizes.

| Samples                                            | Polymer percentage on NDs <sup>a</sup> | Mn by NMR | Mn by GPC | D(nm) | Grafting density (chains nm <sup>-2</sup> ) |
|----------------------------------------------------|----------------------------------------|-----------|-----------|-------|---------------------------------------------|
| ND@POEGMEA <sub>45</sub>                           | 17%                                    | 22200     | 23800     | 150   | 0.404                                       |
| ND@PHEAGem <sub>16</sub> -b-POEGMEA <sub>38</sub>  | 20%                                    | 26300     | 34800     | 159   | 0.428                                       |
| ND@PHEAGem <sub>10</sub> -co-POEGMEA <sub>14</sub> | 18%                                    | 12000     | 16600     | 182   | 0.961                                       |
| ND@PHEAGem <sub>20</sub> -co-POEGMEA <sub>40</sub> | 25%                                    | 28500     | 36700     | 165   | 0.512                                       |
| ND@PHEAGem <sub>2</sub> -co-POEGMEA <sub>18</sub>  | 20%                                    | 10200     | 14000     | 272   | 1.87                                        |
| ND@PHEAGem <sub>12</sub> -co-POEGMEA <sub>28</sub> | 19%                                    | 19700     | 22800     | 226   | 0.775                                       |

Number of chains on NDs:

$$\text{Chains} = \frac{\Delta m}{Mn} * NA$$

Where  $\Delta m$  is the polymer percentage grafted on NDs, Mn is the molecular weight calculated from NMR and NA is Avogadro constant.

The specific surface are of a sphere:

$$SSA = \frac{6}{D * \rho}$$

$$\rho = 3.52 \text{ g cm}^{-3} = 3.52 \times 10^{-21} \text{ g nm}^{-3}$$

Grafting density:

$$D = \frac{\text{chains}}{SSA}$$

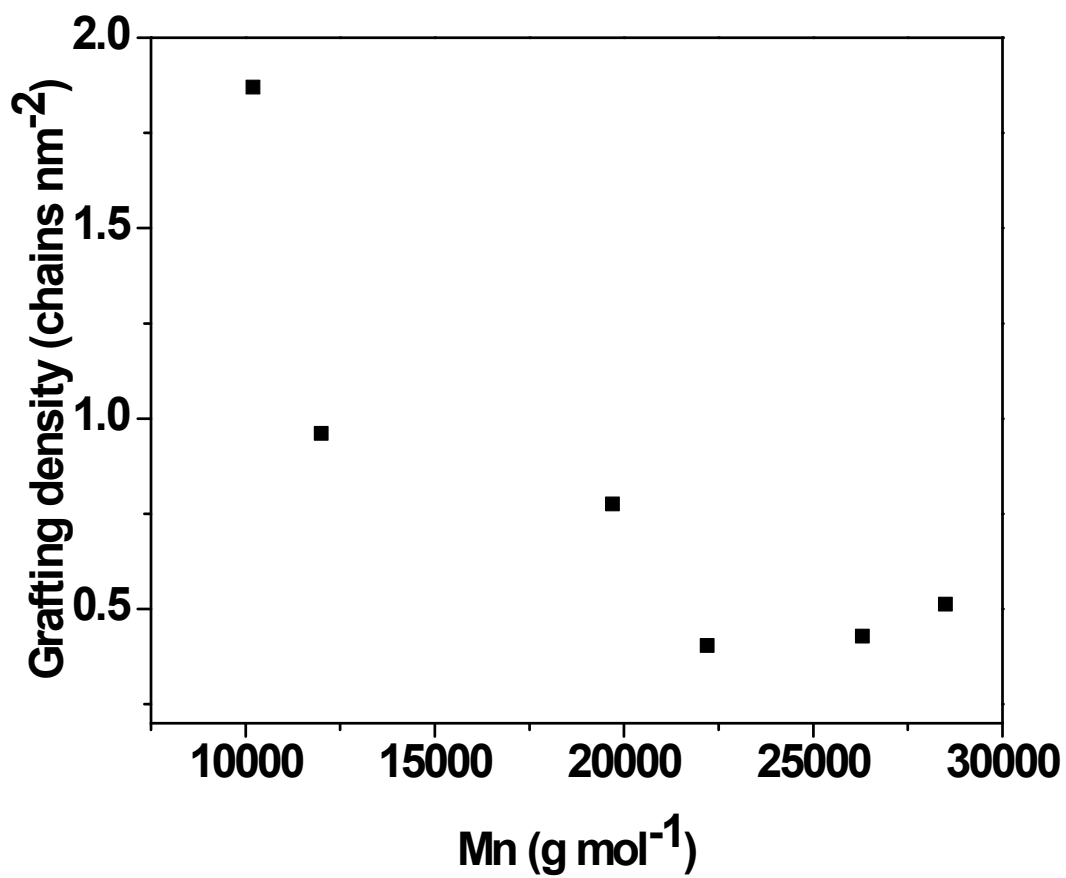

**Figure S16.** Correlation between grafting densities of polymer coated NDs determined by TGA and molecular weight.

#### 4. Drug release.

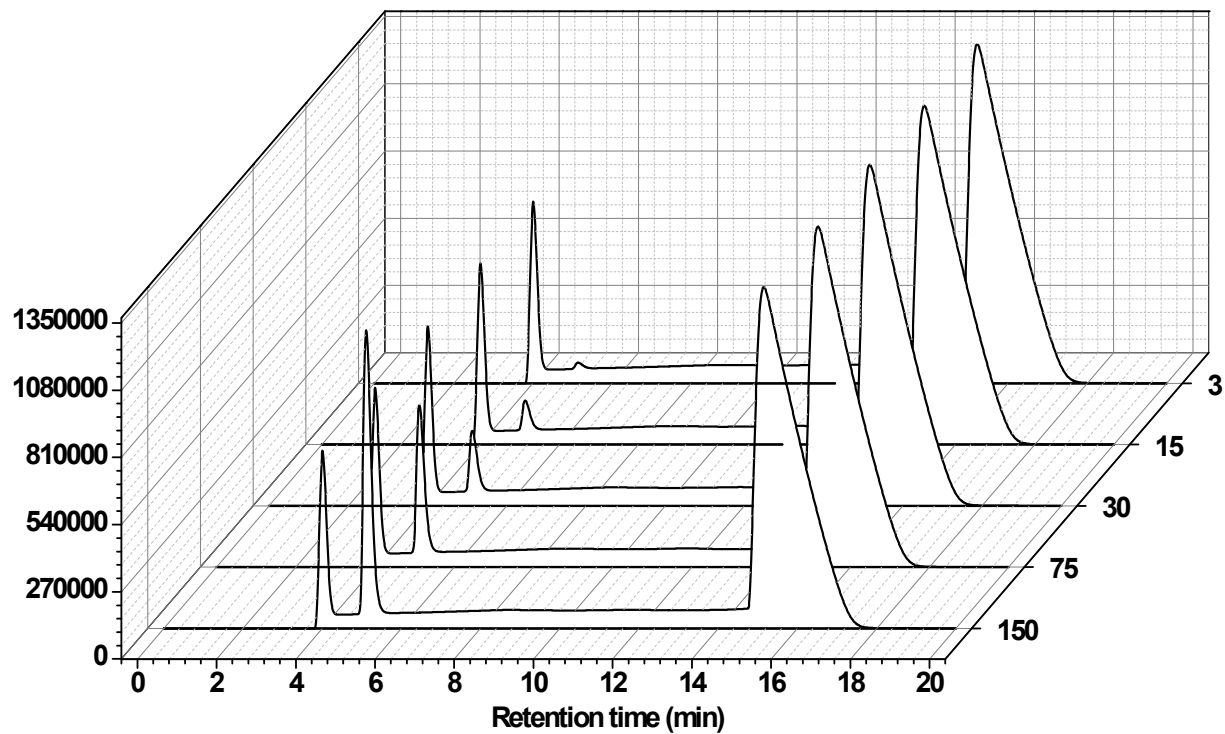

**Figure S17.** Chromatograms of gemcitabine hydrogen chloride standard in pH 5.0 buffer solution with concentration ranging from 3  $\mu\text{g mL}^{-1}$  to 150  $\mu\text{g mL}^{-1}$ .

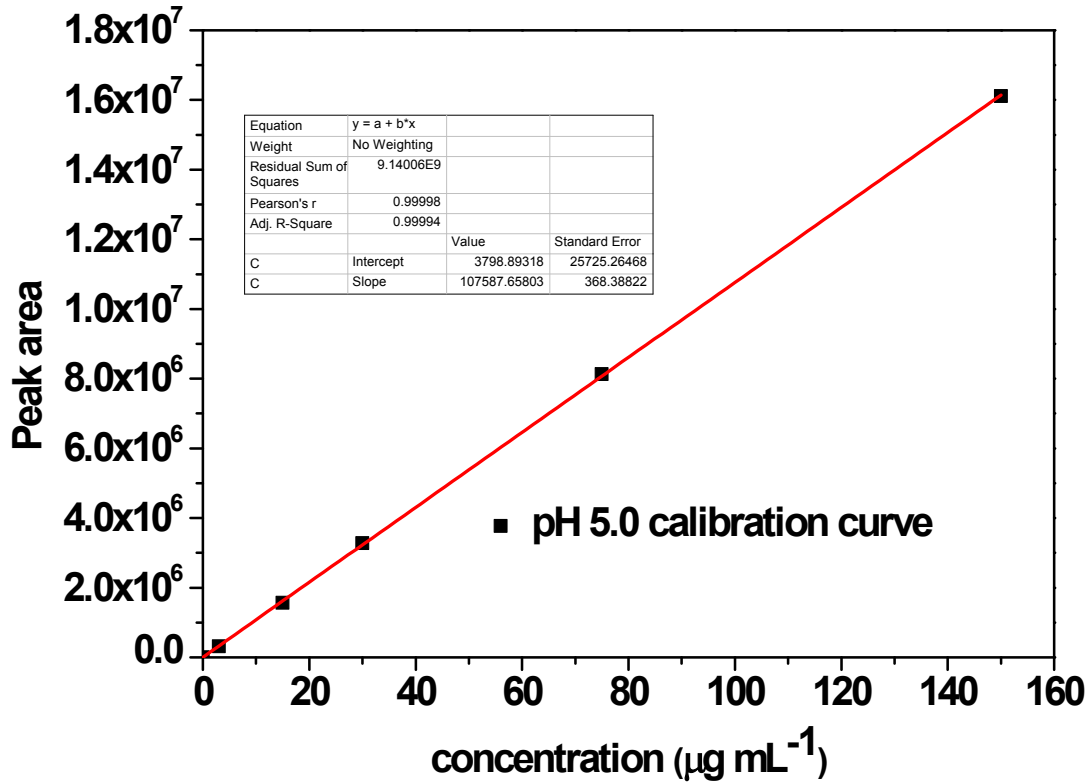

**Figure S18.** Gemcitabine calibration curve correlating the concentration of gemcitabine in pH 5.0 buffer solution with the area under the peak as analyzed by HPLC.

The equation for the fitted linear plot is:

$$\text{Area} = 107587 * \text{concentration} + 3799$$

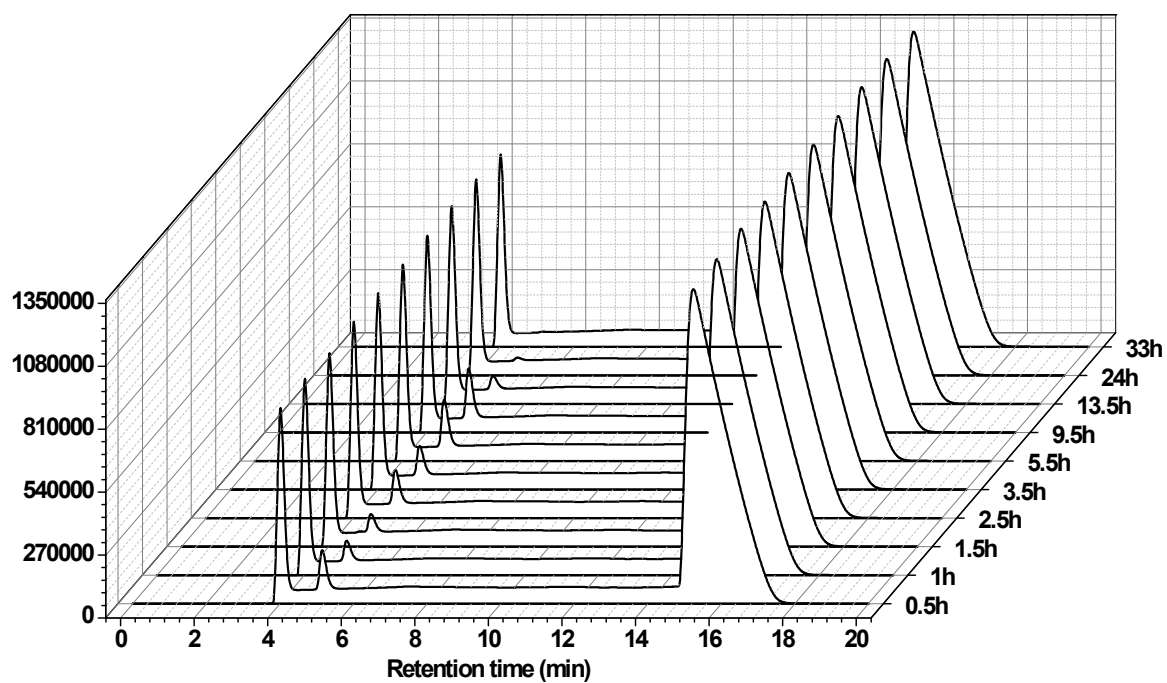

**Figure S19.** Chromatograms of gemcitabine released from ND@PHEAGem<sub>20-co</sub>-POEGMEA<sub>40</sub> in pH 5.0 buffer solution at different time intervals.

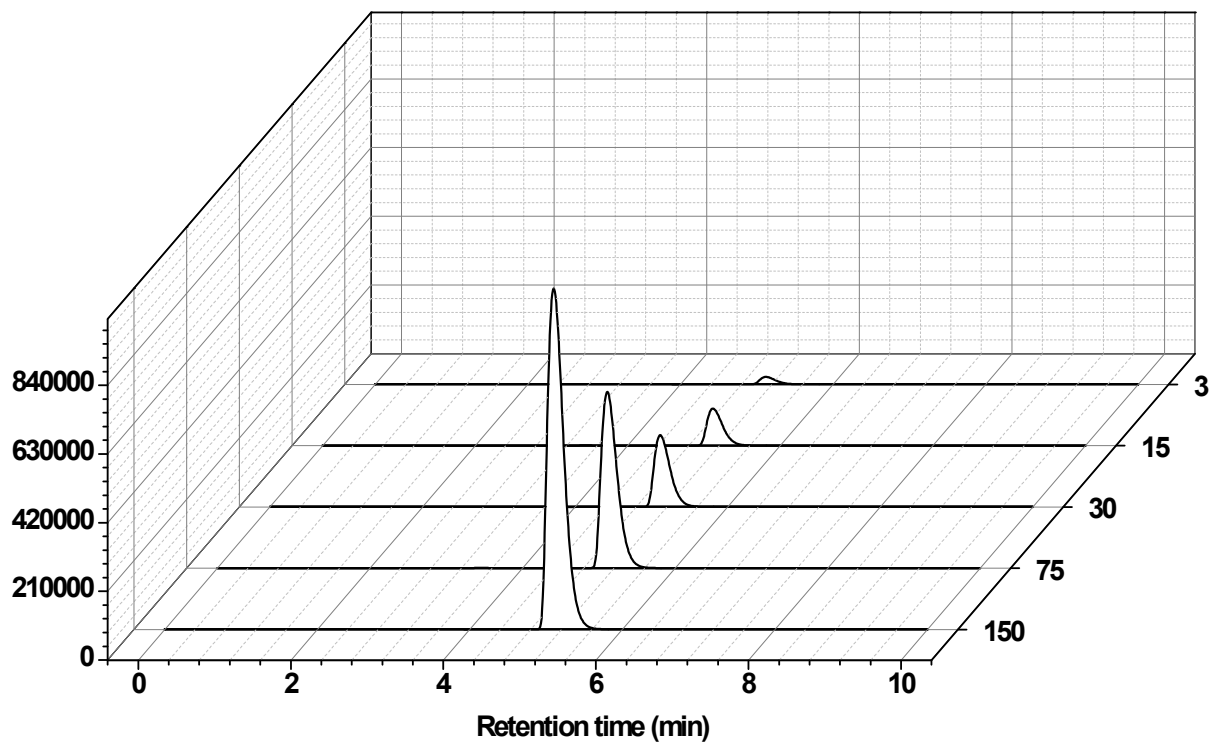

**Figure S20.** Chromatograms of gemcitabine hydrogen chloride standard in pH 7.4 buffer solution with concentration ranging from 3  $\mu\text{g mL}^{-1}$  to 150  $\mu\text{g mL}^{-1}$ .



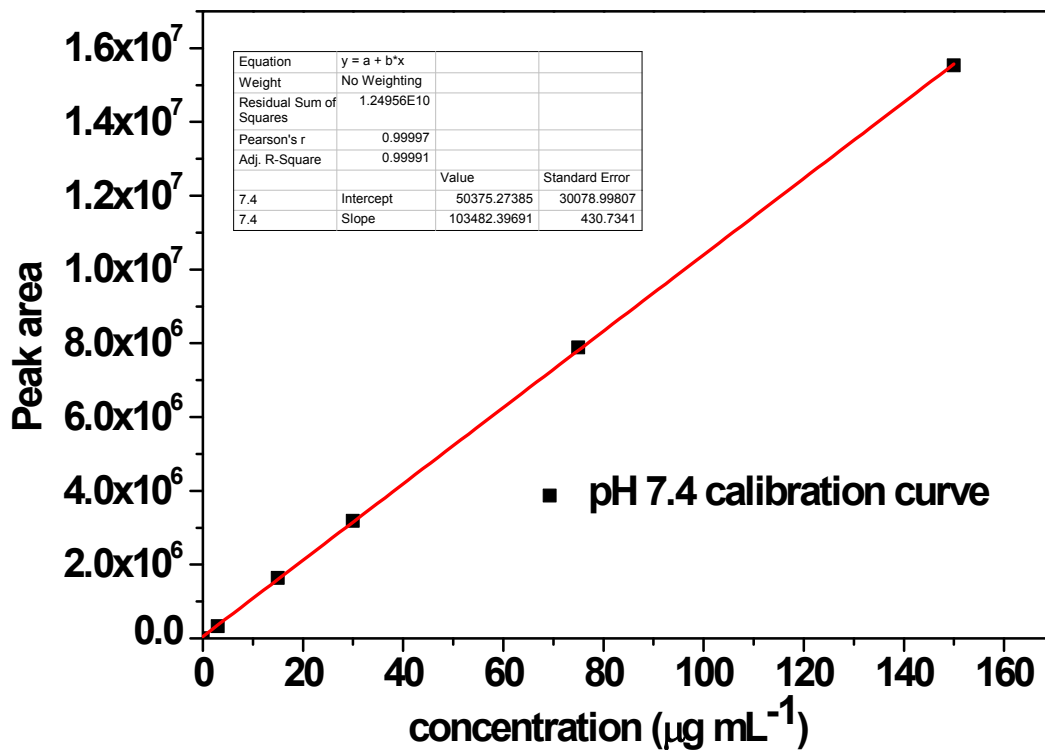

**Figure S21.** Gemcitabine calibration curve correlating the concentration of gemcitabine in pH 7.4 buffer solution with the area under the peak as analyzed by HPLC.

The equation for the fitted linear plot is:

$$\text{Area} = 103482 * \text{concentration} + 50375$$

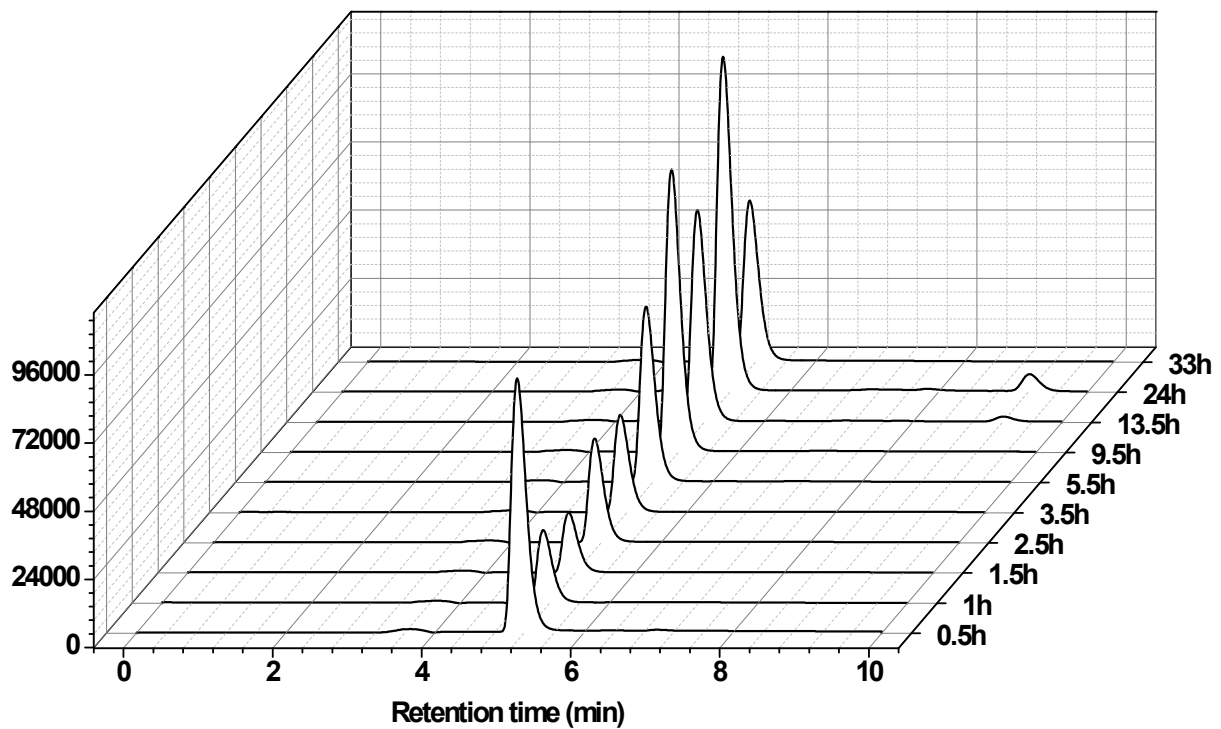

**Figure S22.** Chromatograms of gemcitabine released from ND@PHEAGem<sub>20</sub>-co-POEGMEA<sub>40</sub> in pH 7.4 buffer solution at different time intervals.

**Table S2.** Peak areas at different time intervals and the corresponding concentration for drug release study of ND@PHEAGem<sub>20-co</sub>-POEGMEA<sub>40</sub>.

| Time (h) | Area (pH 5.0) | Cumulative Area (pH 5.0) | Concentration ( $\mu\text{g mL}^{-1}$ ) | Area (pH 7.4) | Cumulative Area (pH 7.4) | Concentration ( $\mu\text{g mL}^{-1}$ ) |
|----------|---------------|--------------------------|-----------------------------------------|---------------|--------------------------|-----------------------------------------|
| 0.5      | 2105280       | 2105280                  | 19.5                                    | 1259603       | 1259603                  | 11.50                                   |
| 1        | 1047347       | 3152627                  | 29.2                                    | 361081        | 1620684                  | 15.0                                    |
| 1.5      | 924020        | 4076647                  | 37.8                                    | 295647        | 1916331                  | 17.8                                    |
| 2.5      | 1847349       | 5923996                  | 55.0                                    | 511504        | 2427935                  | 22.8                                    |
| 3.5      | 1585095       | 7509091                  | 69.7                                    | 481643        | 2909478                  | 27.4                                    |
| 5.5      | 2586274       | 10095365                 | 93.8                                    | 866807        | 3776285                  | 35.8                                    |
| 9.5      | 2647907       | 12743272                 | 118.4                                   | 1400160       | 5176445                  | 49.4                                    |
| 13.5     | 686341        | 13429613                 | 124.7                                   | 1040583       | 6217028                  | 59.5                                    |
| 24       | 146964        | 13576577                 | 126.1                                   | 1656587       | 7873615                  | 75.5                                    |
| 33       | 34409         | 13610986                 | 126.4                                   | 808091        | 8681706                  | 83.3                                    |
| 48       | 10012         | 13620998                 | 126.5                                   | 766779        | 9448485                  | 90.7                                    |
| 60       | negligible    | 13620998                 | 126.5                                   | 286077        | 9734562                  | 93.5                                    |
| 84       | negligible    | 13620998                 | 126.5                                   | 353920        | 10088482                 | 96.9                                    |
| 96       | negligible    | 13620998                 | 126.5                                   | 141799        | 10230281                 | 98.3                                    |

**Drug content calculation by HPLC:**

ND@PHEAGem<sub>20-co</sub>-POEGMEA<sub>40</sub>

Final drug concentration: 126.5 µg mL<sup>-1</sup>

Concentration of NDs: 2 mg mL<sup>-1</sup>

Drug content in NDs: 126.5/2 µg mg<sup>-1</sup>=63.3 µg mg<sup>-1</sup>

**Drug content calculation by TGA and monomer ratio in polymer:**

Ratio of HEAGem:OEGMEA in polymer: 1:2

Weight percentage of HEAGem:  $\frac{1 * 463}{1 * 463 + 2 * 480} = 0.32$

Molecular weight of gemcitabine hydrogen chloride: 300 g mol<sup>-1</sup>

Gemcitabine content if released completely:  $\frac{0.25 * 0.32}{463} * 300 * 1000 = 51.8 \text{ µg mg}^{-1}$

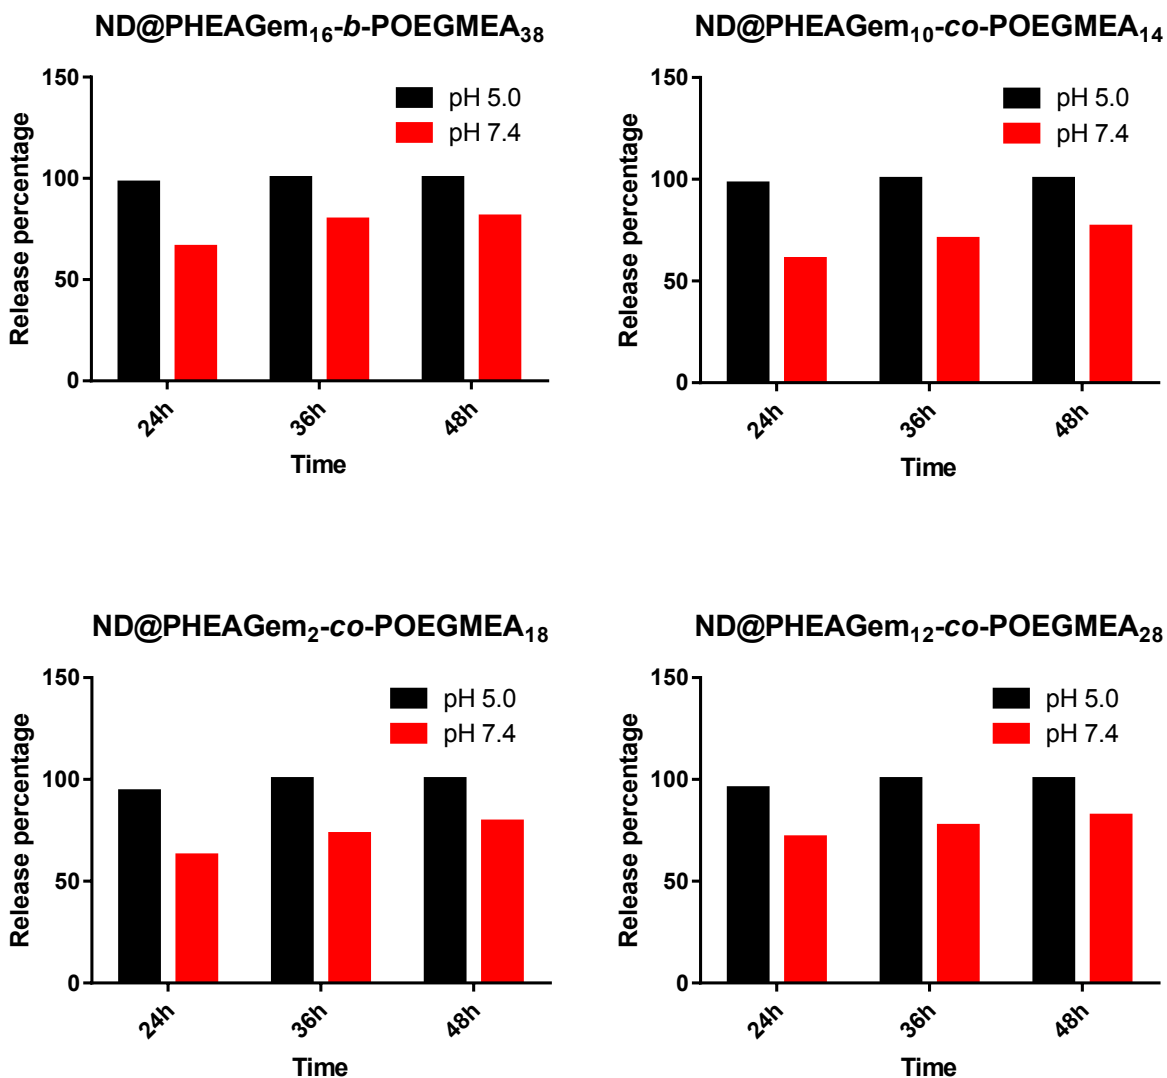

**Figure S23.** Cumulative release of gemcitabine versus time from ND@PHEAGem<sub>16-b</sub>-POEGMEA<sub>38</sub>, ND@PHEAGem<sub>10-co</sub>-POEGMEA<sub>14</sub>, ND@PHEAGem<sub>2-co</sub>-POEGMEA<sub>18</sub> and ND@PHEAGem<sub>12-co</sub>-POEGMEA<sub>28</sub> in buffer solution with pH 5.0 and 7.4 with concentration of 2 mg mL<sup>-1</sup>.

## 5. Cytotoxicity Test

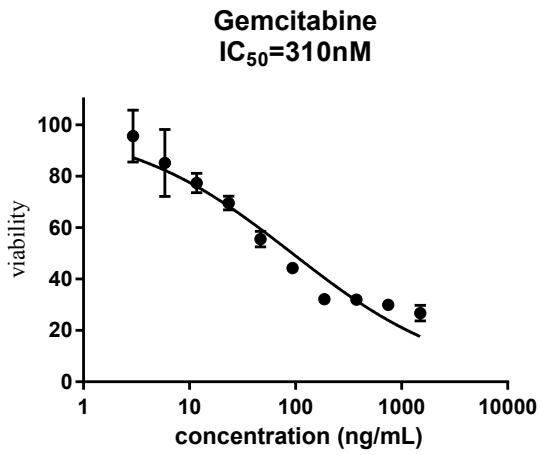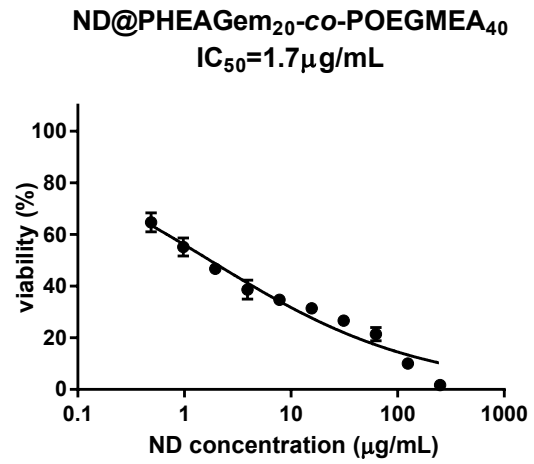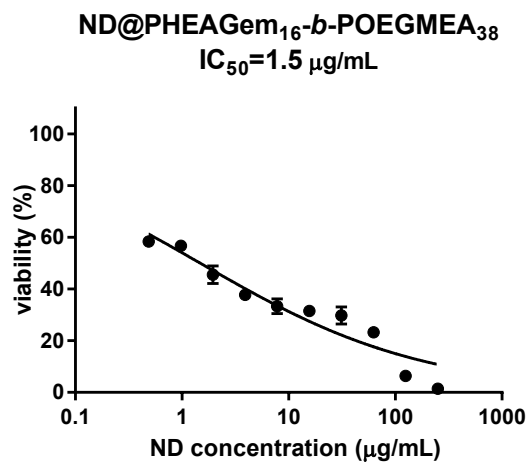

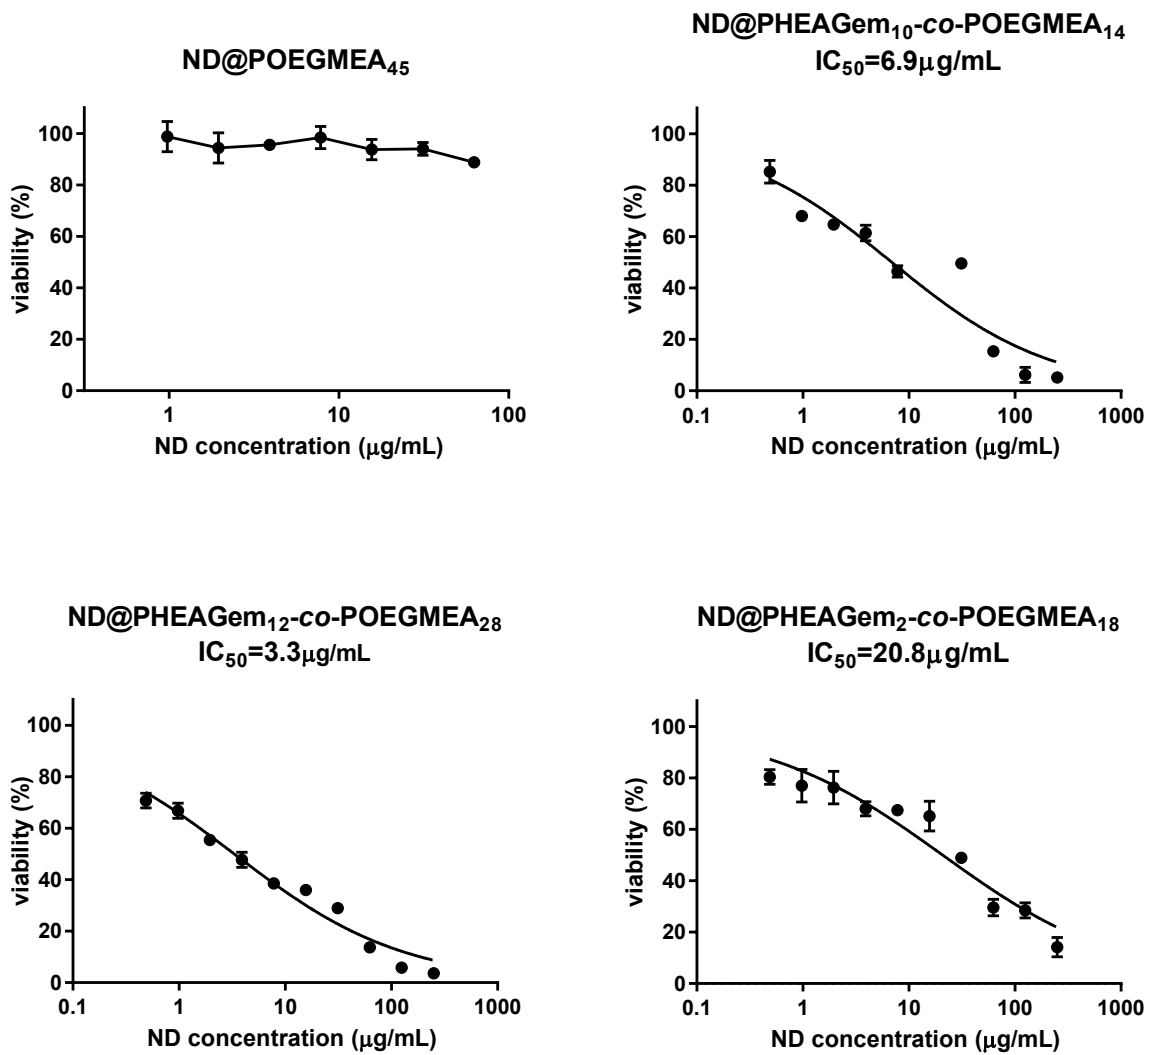

**Figure S24.** Cytotoxicity of Gemcitabine and polymer coated NDs.
